1     **Genome wide screen reveals a specific interaction between autosome and X**  
2                     **that is essential for hybrid male sterility**

3     Yu Bi<sup>1</sup>, Xiaoliang Ren<sup>1</sup>, Runsheng Li<sup>1</sup>, Qiutao Ding<sup>1</sup>, Dongying Xie<sup>1</sup>, and Zhongying Zhao<sup>1,2\*</sup>

4     <sup>1</sup>Department of Biology, Hong Kong Baptist University, Hong Kong, China; <sup>2</sup>State Key  
5     Laboratory of Environmental and Biological Analysis, Hong Kong Baptist University, Hong Kong,  
6     China

7

8     \*Corresponding author

9     Zhongying Zhao, PhD

10    State Key Laboratory of Environmental and Biological Analysis

11    Department of Biology, Hong Kong Baptist University

12    Hong Kong

13    Email: zyzhao@hkbu.edu.hk

14    Phone: 852-3411-7058

15    **Running title:** Role of X- autosome interaction in hybrid male sterility

16    **Keywords**

17    Hybrid male sterility, *Caenorhabditis briggsae*, *C. nigoni*, introgression, X-autosome interaction

## 1 **Abstract**

2 Hybrid male progeny from interspecies cross are more prone to sterility or inviability than hybrid  
3 female progeny, and the male sterility and inviability often demonstrate a parent-of-origin  
4 asymmetry. However, the underlying mechanism of asymmetric sterility or inviability remains  
5 elusive. We previously established a genome-wide hybrid incompatibility (HI) landscape between  
6 *Caenorhabditis briggsae* and *C. nigoni* by phenotyping a large collection of *C. nigoni* strains each  
7 carrying a *C. briggsae* introgression. In this study, we investigate the genetic mechanism of  
8 asymmetric sterility and inviability in both hybrid male and female progeny between the two  
9 species. Specifically, we performed reciprocal crosses between *C. briggsae* and different *C. nigoni*  
10 strains that each carries a GFP-labeled *C. briggsae* genomic fragment referred to as introgression,  
11 and scored the HI phenotypes in the F1 progeny. The aggregated introgressions cover 94.6% of  
12 the *C. briggsae* genome, including 100% of the X chromosome. Surprisingly, we observed that  
13 two *C. briggsae* X fragments that produce *C. nigoni* male sterility as an introgression rescued  
14 hybrid F1 sterility in males fathered by *C. briggsae*, indicating that at least two separate X-  
15 autosome interactions are involved in the hybrid male sterility. In addition, we identified another  
16 two *C. briggsae* genomic intervals on the Chromosome II or IV, respectively, which can rescue  
17 the inviability, but not the sterility, of hybrid F1 males fathered by *C. nigoni*, suggesting the  
18 involvement of differential epistatic interactions in the asymmetric hybrid male fertility and  
19 inviability. Importantly, backcrossing of the rescued sterile males with *C. nigoni* led to isolation  
20 of a 1.1-Mb genomic interval that specifically interacts with an X-linked introgression, which is  
21 essential for hybrid male fertility. We further identified three *C. briggsae* genomic intervals on the

1 Chromosome I, II and III, respectively that produce inviability in all F1 progeny dependent or  
2 independent of the parent-of-origin. Taken together, we identified multiple independent interacting  
3 loci that are responsible for asymmetric hybrid male and female sterility and inviability, which  
4 provides important insights into the asymmetric HI and lays a foundation for their molecular  
5 characterization.

6

## 7 **Author summary**

8 It is common that closely related species can mate with each other, but their hybrid progeny are  
9 often sterile or inviable, especially in the male progeny. The mechanism underlying the  
10 asymmetric sterility or inviability remains poorly understood. We previously addressed this  
11 question between two nematodes, *Caenorhabditis briggsae* and *C. nigoni*, by systematic  
12 substitution of various parts of the *C. nigoni* genome with its *C. briggsae*'s equivalent followed by  
13 phenotypic examination. Here we investigate the genetic mechanism of the asymmetric sterility  
14 and inviability in the hybrid F1 male and female progeny between the two species. We achieved  
15 this through crossing a cohort of *C. nigoni* strains each carrying a substitution with *C. briggsae*,  
16 which led to differential homozygosity of the *C. briggsae* substitution in the hybrid progeny. The  
17 aggregated substitutions cover 94.6% of the *C. briggsae* genome, including 100% of the X  
18 chromosome. Surprisingly, we identified two *C. briggsae* X fragments that produced *C. nigoni*  
19 male sterility as a substitution but rescued hybrid F1 sterility in males fathered by *C. briggsae*,  
20 indicating that at least two separate X-autosome interactions are involved in the hybrid male

1 sterility. In addition, we identified multiple genomic intervals on *C. briggsae* autosomes that can  
2 rescue the inviability, but not the sterility, of hybrid F1 males fathered by *C. nigoni*. Importantly,  
3 we isolated a 1.1-Mb genomic interval that specifically interacts with an X-linked introgression,  
4 which is essential for hybrid male fertility. We further identified three *C. briggsae* genomic  
5 intervals on the Chromosome I, II and III, respectively that produce inviability in all F1 progeny  
6 dependent or independent of the parent-of-origin. The identified interacting loci lays a foundation  
7 for their molecular characterization.

8

## 1 **Introduction**

2 Postzygotic hybrid incompatibility (HI) presents one of the major barriers to gene flow between  
3 species or populations, leading to reproduction isolation or its enforcement. HI commonly  
4 manifests as hybrid male sterility or overall hybrid inviability, and has undergone intensive study  
5 over in recent decades [1]. Identification of HI loci has become a major task of evolutionary  
6 biologists. Antagonistic interactions between parental alleles with differential divergence are  
7 predicted to become incompatible, hereafter termed Dobzhansky–Muller incompatibility (DMI)  
8 [2,3], which is believed to be responsible for the HI phenotypes in the hybrid progeny. Genetic  
9 studies of HI have isolated various loci across phyla. A subset of the HI loci has been molecularly  
10 cloned, which had provided unprecedented insights into speciation genetics [1]. Hybrid male  
11 sterility is more common than other types of HI phenotype, which is dubbed Haldane’s rule [4].  
12 The male sterility or viability phenotypes often depend on the parent of origin, which is called  
13 Darwin’s corollary to Haldane’s rule [5]. The two rules are well supported in the interspecies  
14 hybrids cross species [6–9]. The X Chromosome has been shown to play a disproportionately  
15 larger role in hybrid male sterility in diverse organisms, which is termed the “large-X effect”  
16 [10,11]. However, whether X-linked incompatibilities contribute disproportionately to asymmetric  
17 hybrid inviability, especially female’s inviability, has yet been established [12]. The key to  
18 understanding the genetic mechanism of these two rules is to isolate specific genomic intervals  
19 that are responsible for the asymmetric HI phenotypes in both hybrid F1 and nearly isogenic  
20 genetic backgrounds [13].

1 *Caenorhabditis elegans* has been intensively studied for neuron development [14], tissue  
2 differentiation [15,16] and organogenesis [17] and population genetics [18–20]. However, it has  
3 contributed little to speciation genetics, although incipient speciation seems to be obvious among  
4 various populations [21,22]. Such study has been inhibited by the lack of a sister species that can  
5 mate with *C. elegans* and produce viable hybrid progeny [23]. An improved sampling method  
6 introduced in the early 2000s dramatically accelerated the recovery of new *Caenorhabditis* species  
7 [24–26], which led to discovery of a few new pairs of sister species that can mate and produce  
8 viable progeny [8,27]. For example, crosses between a newly identified sister species pair, *C.*  
9 *remanei* and *C. latan*, produced pronounced asymmetric hybrid male sterility and extensive hybrid  
10 F2 breakdown [28]. Reciprocal crosses suggested that the genetic basis of hybrid inviability is  
11 more complex than hybrid male sterility, and that hybrid male sterility in nematodes involves a  
12 single X-autosome interaction [29]. Unfortunately, mapping resolution of HI in hybrid F1 between  
13 the two species is relatively coarse.

14 The identification of *C. briggsae* sister species, *C. nigoni*, has paved the way for using the use this  
15 pair for speciation genetics [8]. *C. briggsae* is a close relative of *C. elegans*. They share  
16 morphology and developmental patterns [30] and are mostly hermaphrodites with occasional  
17 males, whereas *C. nigoni* is a strictly dioecious species that is mostly found in tropical areas [8].  
18 Both species contain five autosomes and a single sex chromosome X, with XO as male and XX as  
19 female or hermaphrodite. Studies on their hybrid supported both Haldane’s rule and Darwin’s  
20 corollary to Haldane’s rule [8,9]. For example, a cross with *C. briggsae* as the father produces  
21 hybrid fertile F1 females but sterile F1 males, whereas a cross in the opposite direction produces

1 hybrid fertile F1 females only (Fig. 1). However, the genetic mechanism that underlies the  
2 asymmetric HI phenotypes remains elusive. To empower *C. briggsae* and *C. nigoni* as a model for  
3 speciation genetics, we previously generated approximately 100 visible transgenic markers that  
4 express green fluorescent protein (GFP), and each was inserted into a different part of an individual  
5 chromosome [31,32]. Because they can serve as a dominant marker for its linked *C. briggsae*  
6 genomic fragment in the hybrid progeny during backcross, these markers greatly facilitated  
7 mapping of the HI loci between the two species. Systematic backcross of all of these markers into  
8 *C. nigoni* for at least 15 generations led to a genome-wide HI landscape consisting of *C. briggsae*  
9 introgression in an otherwise *C. nigoni* background [31]. Notably, each these HI loci was identified  
10 in essentially a *C. nigoni* background. It is expected that the underlying mechanisms of HI in hybrid  
11 F1 and in the essentially isogenic genetic background that carries an introgression will differ  
12 greatly but remain poorly defined in any species.

13 Previous study showed few involvement of mitochondria in hybrid F1 phenotype [33], indicating  
14 that most HI phenotypes result from incompatibility between nuclear genomes. A loss of function  
15 allele in *Cbr-him-8* in *C. briggsae* hermaphrodite was shown to produce viable and fertile hybrid  
16 male progeny when mated to the *C. nigoni* father [34]. Such males would allow many other genetic  
17 study, such as isolation of genes responsible for hermaphroditism. However, subsequent repeat of  
18 this cross experiment was unsuccessful [35], suggesting that the rescue of the male sterility and  
19 inviability may be an artifact from incomplete sperm depletion of *C. briggsae* mother. To search  
20 for the rescue of male sterility or inviability observed from reciprocal crosses between the two  
21 species, we took advantage of a large collection of *C. nigoni* strains each carrying an *C. briggsae*-

1 specific introgression fragment we generated previously [31]. We performed a genome-wide  
2 screen for specific *C. briggsae* genomic fragments that could rescue the male sterility or inviability  
3 by crossing the introgression-bearing *C. nigoni* with *C. briggsae* in both directions whenever  
4 applicable. We identified various introgression fragments that were able to rescue either the male  
5 sterility or inviability. We also identified genomic intervals that kill both hybrid males and females  
6 in cross direction-dependent or independent way. Availability of hybrid F1 fertile male further  
7 permitted us to isolate a specific X-autosome interaction that is essential for hybrid male fertility.

8

## 9 **Results**

10 **X-linked *C. briggsae* introgressions lead to male sterility in *C. nigoni* but rescue the male**  
11 **sterility in hybrid F1 progeny.**

12 One of the most common HIs between these two species is hybrid F1 male sterility between the  
13 two species with *C. briggsae* as the father (Fig. 1). We previously identified at least two  
14 independent *C. briggsae* genomic fragments from its X Chromosome that produced male sterility  
15 in *C. nigoni* as an introgression (Fig. 2A) [31]. However, the *C. nigoni* females that carry the same  
16 introgression are fertile. To systematically identify the *C. briggsae* genomic fragment that can  
17 rescue the inviability of F1(n, b) (see Materials and Methods) male, we performed reciprocal  
18 crosses between wild-type *C. briggsae* and *C. nigoni* lines that each carries an independent X-  
19 linked or autosome-linked introgression. To achieve a maximal coverage of the *C. briggsae*  
20 genome, we selected a subset of introgressions that show little or no overlap, which we generated



1 in a previous study [31]. In addition, to narrow the interval responsible for the rescue, we included  
2 several introgressions that overlapped with those that were confirmed to produce changes in F1  
3 phenotypes. As a result, we performed crosses for a total of 29 introgression lines, covering 94.6%  
4 of the *C. briggsae* genome, with complete coverage of the X Chromosome (Table S1).

5 To our surprise, we observed opposite phenotypes caused by either of the introgressions in *C.*  
6 *nigoni* and in hybrid F1 progeny; that is, a cross between *C. briggsae* males and *C. nigoni* females  
7 with the introgressions produced hybrid fertile males, but a similar cross without the introgressions  
8 produced hybrid sterile males (Figs. 1 & 2A), which suggests that an epistatic interaction between  
9 the introgression and some autosomal fragments was responsible for the observed male sterility.  
10 The gonad morphology of the rescued males was similar to that of their parental males (Fig. S1).  
11 The availability of a hybrid F1(b, n) fertile male opens the door for further genetic dissection of  
12 X-autosome interaction that is required for hybrid male fertility as described below.

13 In hybrid F1 adult progeny fathered by *C. briggsae*, the hybrid F1 males, which was referred to as  
14 F1(b, n) males, were not only sterile, but also demonstrated a disproportional segregation of sex  
15 ratio; that is, approximately 35% of the hybrid F1 progeny were male, and the rest were females,  
16 indicating that there are some other epistatic interactions that led to hybrid male inviability. To  
17 investigate whether the mapped genomic interval that rescued the hybrid male sterility also rescued  
18 the hybrid male inviability, we quantified the ratio of introgression-bearing males and females  
19 among all the hybrid F1 progeny from the following cross, that is, between a *C. briggsae* male and  
20 a *C. nigoni* female carrying an introgression from various parts of the *C. briggsae* X Chromosome.

1 We found that only one of the X-linked introgressions rescued the hybrid male inviability (Fig.  
2 2B), suggesting that separate loci are responsible for the male sterility and inviability.

3

#### 4 **Sperm sizes of the rescued hybrid males is more similar to that of wild type *C. nigoni* males**

5 The sperm size of hermaphroditic *C. briggsae* is significantly smaller than that of dioecious *C.*  
6 *nigoni* [36], and mating between the two species with *C. nigoni* as the father sterilized the maternal  
7 *C. briggsae* [37]. We wondered which parental alleles that control sperm size are dominant. We  
8 therefore quantified the sperm size derived from the hybrid sterile, the rescued fertile males, and  
9 the parental males. We found that the sperm size of the hybrid F1(b, n) sterile males was  
10 comparable to that of *C. briggsae*, but the sperm of the rescued hybrid fertile males was  
11 significantly larger (Fig. 2C, E-I), suggesting that the *C. briggsae* alleles that control sperm size  
12 are mainly recessive. It also suggested that spermatogenesis fails during the formation of primary  
13 spermatocytes in the hybrid sterile males [36]. Sperm activation rate was comparable between two  
14 rescued males but was significantly higher than the hybrid F1(b, n) males (Fig. 2D, J-N).

15

#### 16 **Few improvements on F2 breakdown when backcrossed to *C. briggsae***

17 One of prominent asymmetric HI phenotypes between *C. briggsae* and *C. nigoni* is the complete  
18 F2 breakdown of all progeny derived from the reciprocal crosses between *C. briggsae* and a hybrid  
19 F1 female (Fig. 1). The availability of hybrid F1(b, n) fertile males carrying *zzyIR10330* or  
20 *zzyIR10307* provides an opportunity to evaluate whether the F2 breakdown resulting from

1 backcrossing to *C. briggsae* [8] still holds with an increased contribution from the *C. briggsae*  
2 genome. To test this hypothesis, we scored the brood size, survival rate, and male ratio in the  
3 progeny derived from the crosses between the rescued F1(b, ir) males that carry the X-linked  
4 introgression, *zzyIR10330* and *zzyIR10307*, and the sperm-depleted *C. briggsae* hermaphrodite  
5 (Fig. 3). About a quarter of around 50 laid F2 embryos from the cross developed into adulthood  
6 (Fig. 3 A & B). Notably, the male ratio was significantly higher than that in the F1(b, n) progeny  
7 (Fig. 3C). However, all the surviving F2 males and females became sterile with deformed gonad  
8 (Fig. S2), which suggests that the F2 inviability involved loci other than the X-linked  
9 introgressions used here.

10 We also scored the survival rate in the progeny derived from the crosses in the opposite direction  
11 for all introgressions in this study, that is, the crosses between *C. briggsae* males and the F1  
12 progeny derived from reciprocal crossings between *C. briggsae* and *C. nigoni* carrying an  
13 autosome- or X-linked introgressions. We were intrigued to find that few progeny survived to  
14 adulthood (Fig. S3). Taken together, the increased contribution of the *C. briggsae* genome in the  
15 hybrid did not improve the fertility of the hybrid F2 progeny, thus preventing further backcross  
16 with *C. briggsae* beyond the F2 generation.

17

18 **A specific interaction between the *C. nigoni* Chromosome II and the *C. briggsae* X is**  
19 **responsible for hybrid male sterility in *C. nigoni*.**

1 The availability of hybrid F1 fertile male provides an opportunity to screen for specific X-  
2 autosome interactions that are responsible for the hybrid male sterility (Fig. 4A). Because the  
3 hybrid F1(b, n) males that carry either *zzyIR10330* or *zzyIR10307* are fertile, we randomly chose  
4 one of them, i.e., *zzyIR10330*, to isolate the autosomal interacting loci that are responsible for the  
5 observed rescue. We initiated the crosses by mating wild-type *C. briggsae* males and *C. nigoni*  
6 (*zzyIR10330*) females. The resulting introgression-bearing hybrid F1(b, 10330) (see Materials and  
7 Methods for nomenclature) fertile males were backcrossed with wild-type *C. nigoni* females for  
8 as many as 20 generations using the introgression-bearing fertile male. Therefore, any *C. briggsae*  
9 loci that co-segregated with *zzyIR10330* were expected to be identified by genotyping the fertile  
10 males. Given the possibility of multiple independent *C. briggsae* loci that could co-segregate with  
11 the introgression and together rescue the male sterility, we selected a single male to set up a cross  
12 for genotyping by single-worm polymerase chain reaction (PCR) using the *C. briggsae*-specific  
13 primers as described [6]. We found that the *C. briggsae* Chromosome II had specifically co-  
14 segregated with *zzyIR10330* (Fig. 4B).

15 Given the error-prone feature and limited resolution with the PCR-based method, it is possible that  
16 there are some other co-segregating segments that were missed by the PCR assay. To detect any  
17 other possible fragments that could co-segregate with *zzyIR10330*, we performed whole genome  
18 sequencing with Nanopore technology using the DNAs extracted from the female progeny derived  
19 from the cross between introgression-bearing males and wild-type *C. nigoni* females (see Materials  
20 and Methods). These female progeny, but not the male progeny, were expected to carry the  
21 introgression and any co-segregating loci as heterozygote in an essentially *C. nigoni* background.

1 Consistent with the PCR-based assay, we detected only a single *C. briggsae* fragment on the right  
2 arm of Chromosome II that co-segregated with *zzyIR10330* in the hybrid rescued males (Figs. 4B  
3 and S4). The sequencing results also confirmed that the rescued male fertility did not result from  
4 a decreased length of *zzyIR10330*, but from the co-segregation of *zzyIR10230*.

5 The identified co-segregating *zzyIR10230* is more than a half of the size of the entire Chromosome  
6 II (Fig. 4B), which is expected to result in inviability when rendered homozygous in *C. nigoni*  
7 based on our previous introgression results [31] . To narrow the genomic interval responsible for  
8 the rescue of male sterility, we took advantage of our existing overlapping introgressions in the  
9 same region (Fig. 4B). Specifically, we set up crosses between *C. nigoni* females that carried  
10 *zzyIR10330* and six individual *C. nigoni* strains that each carried an independent introgression that  
11 overlapped with *zzyIR10230*. The presence and absence of fertile males would be indicative of the  
12 introgression's ability or inability, respectively, to rescue the male sterility caused by *zzyIR10330*  
13 in *C. nigoni*, respectively. Our crossing results not only confirmed the significance of *zzyIR10230*  
14 in the rescue of hybrid male sterility, they also allowed us to narrow an interval of 1.1 Mb from  
15 13.35 Mb to 14.45 Mb on the *C. briggsae* Chromosome II (cb4), which interacts with *zzyIR10330*  
16 to rescue the male sterility.

17

18 **Homozygosity of independent autosome introgressions rescue hybrid inviability of F1 (n, b)**  
19 **males.**

1 Another prominent HI phenotype between *C. briggsae* and *C. nigoni* is the hybrid inviability of  
2 F1(n, b) males (Fig. 1). Despite the rescue of hybrid F1(b, n) male sterility by the X-linked  
3 introgressions, these introgressions failed to rescue the inviability of the hybrid F1 (n, b) males,  
4 indicating that differential epistatic interactions are responsible for the parent-of-origin hybrid  
5 male fertility and viability.

6 We were able to identify two independent autosomal intervals on the right and left arms of the  
7 Chromosome II and IV, respectively, that rescued the F1(n, b) male inviability (Fig. 5A). However,  
8 the rescued males were sterile and had malformed gonad and spontaneous sperm activation (Fig.  
9 S5), which suggests that additional loci can be found elsewhere in the *C. briggsae* genome that is  
10 required for the male fertility. Contrasting the overlapping parts of the relevant introgressions  
11 allowed us to narrow the intervals responsible for the observed rescue to roughly 3.8 and 8.9 Mb  
12 on the Chromosome II and IV, respectively (Fig. 5A). To examine whether the viability rescue  
13 was complete, we scored the ratio of introgression-bearing males among all introgression-bearing  
14 progeny. We found that the ratio of the introgression-bearing males is significantly smaller than  
15 the expected 50% for all the five scored introgressions (Fig. 5B), suggesting that the rescue of  
16 viability is incomplete.

17 To investigate the inheritance of sperm size in the rescued hybrid F1(n, b) males that carry a  
18 complete *C. briggsae* X Chromosome, we quantified the sperm size for one line of the viable males  
19 rescued by the introgression, *zzyIR10353*. Again we found that the sperm size of the rescued viable  
20 yet sterile males was comparable to that of wild-type *C. briggsae* males, but was significantly  
21 smaller than that of wild type *C. nigoni* males (Fig. 5C). These results demonstrated that a sperm

1 is functional in the hybrid only when its size is comparable to that of wild type *C. nigoni* males.  
2 They also suggest that a part of the *C. briggsae* X other than *zzyIR10330*, is incompatible with *C.*  
3 *nigoni* autosomes, which is likely to explain the observed male sterility.

4

5 **Parent-of-origin dependent or independent killing of both male and female F1 progeny by**  
6 **different autosomal introgressions**

7 Despite the sterility or the inviability of the hybrid F1 males, the hybrid F1 females between *C.*  
8 *briggsae* and *C. nigoni* were mostly viable and fertile regardless of their parent of origin (Fig. 1)  
9 [8]. Unexpectedly, we observed three independent autosomal intervals located on the Chromosome  
10 I, II, and IV, respectively, that produced inviability of both hybrid male and female progeny that  
11 carried an introgression, hereafter termed as complete inviability, when present as a homozygote  
12 in the cross progeny between *C. briggsae* males and introgression-bearing *C. nigoni* females (Fig.  
13 5A). The intervals on the Chromosome I and II were supported by one and two introgression(s),  
14 respectively, which produced a complete inviability of F1(b, ir), whereas the interval on  
15 chromosome IV was supported by a single introgression, which produced complete inviability  
16 independent of the parent of origin. Apparently, only nuclear genomes were involved in the  
17 inviability because the viability was not improved when *C. nigoni* mitochondria were substituted  
18 by its *C. briggsae* equivalent (Table S3). Given that the three introgressions produced no  
19 inviability in the otherwise *C. briggsae* background as a heterozygote, their epistatic interactions  
20 with the remaining *C. nigoni* genome are likely to be recessive in the hybrid F1 background. No

1 introgression on the X Chromosome produced complete inviability when present as homozygote  
2 or hemizygote, indicating that the X Chromosome is barely involved in the hybrid female viability  
3 either in hybrid F1 progeny or in the *C. nigoni* strains that carry a *C. briggsae* introgression.

4 To evaluate the effects of autosomal introgression on the male viability in hybrid F1 progeny, we  
5 scored the ratio of introgression-bearing males among all the hybrid F1 progeny that carried an  
6 introgression from crosses between *C. briggsae* males and *C. nigoni* females that carried an  
7 introgression. We found that the ratio of male was significantly lower than that of females in nearly  
8 all the hybrid progeny that carried an autosome-linked introgression (Fig. S6). In contrast, the ratio  
9 of males was comparable to that of females in nearly all hybrid progeny that carried an X-linked  
10 introgression (Fig. 1B), which is consistent with the observation that male-specific genes are  
11 enriched on autosome but depleted on the X Chromosome [38].

12

### 13 **Partial homozygosity for *C. briggsae* alleles rarely increased the incidence of selfing relative** 14 **to the F1 generation**

15 Another purpose of the crosses using the introgression strains was to explore whether the increased  
16 proportion of the *C. briggsae* genome in the hybrid can recover the selfing capability of the hybrid  
17 females. To this end, we examined the fertility of all crossing females that carried an introgression  
18 by plating a single hybrid L4 *C. briggsae* or *C. nigoni* female. We found only the L4 progeny from  
19 the cross between *C. briggsae* male and the *C. nigoni* female carrying an introgression, *zzyIR10320*,  
20 was able to produce approximately 50 eggs without further mating. A couple of the eggs hatched



1 and grew to adulthood. However, all of them were all sterile females, indicating that increased  
2 proportion of *C. briggsae* genome in the hybrid did not recover the selfing capability.

3

#### 4 **Discussion**

5 Asymmetric male sterility or inviability is common in cross-species hybrids, but the mechanism  
6 responsible for these phenotypes is poorly defined from both genetic and molecular standpoints.  
7 Despite intensive study of hybrid male sterility or inviability, the mechanism of hybrid female  
8 inviability remains largely unknown. In this study, we investigated the genetic mechanism of  
9 asymmetric defects in viability and fertility of hybrid male and female progeny between  
10 hermaphroditic *C. briggsae* and dioecious *C. nigoni*.

#### 11 **Differential genetic mechanism between hybrid male sterility and viability and female** 12 **viability**

13 The availability of hybrid F1(b, n) fertile males that carry a GFP-labeled introgression allowed us  
14 to dissect the genetic loci involved in hybrid F1 male sterility. By contrasting the genotypes  
15 between F1(b, n) sterile and F1(b, 10330) or F1(b, 20307) fertile males, we were able to deduce at  
16 least two independent incompatible interactions between the *C. nigoni* homologous region of  
17 *zzyIR10330* or *zzyIR10307* and the *C. briggsae* autosome in the hybrid F1(b, n) males, which are  
18 responsible for the observed sterility (Fig. 6). This is because the only difference in genotype  
19 between the two was the presence of *zzyIR10330* or *zzyIR10307* in the fertile males but not in the  
20 sterile males. This finding is consistent with the notion that the evolution of sex chromosomes is

1 no longer dominated by the unique genetic features of the sex chromosomes themselves, but rather  
2 a result of global interactions between sex chromosomes and autosomes [39]. The study of gene  
3 birth in the *Drosophila* genome revealed disproportional translocation of X-linked genes to  
4 autosome, which are predominately testis-specific genes [40]. Intriguingly, *Drosophila* genes  
5 translocated from autosome to the Y Chromosome are undergoing rapid degeneration and  
6 pseudogenization, suggesting a differential selection pressure of bidirectional gene translocation  
7 between the autosome and the X Chromosome. Given that the size of the hermaphroditic *C.*  
8 *briggsae* genome is substantially smaller than that of the dioecious *C. nigoni* and [41,42], and  
9 other *Caenorhabditis* species [43], it remains to be determined whether differential gene  
10 translocation exists between the X Chromosome and the autosomes between the two species,  
11 which is responsible for the observed X-autosome interaction.

12 F1(n, b) males are inviable (Fig. 1). One of the two intervals that is required for the rescue of  
13 hybrid inviability in F1(n, b) males is located on the *C. briggsae* Chromosome II, which is the  
14 same as the one responsible for the rescue of sterility in *C. nigoni* males carrying *zzyIR10330* (Figs.  
15 2A and 5A). However, the region did not rescue the sterility of the F1(n, b) males (Fig. 5A&C),  
16 which indicates that the hybrid male fertility and viability involve different loci. The other interval  
17 required for the rescue of hybrid inviability of F1(n, b) males is located on the Chromosome IV. It  
18 is possible that the two intervals are more compatible with the *C. briggsae* X Chromosome than  
19 its *C. nigoni* syntenic parts in the hybrid F1(n, b) background, which led to the rescue.

20 Intriguingly, all the X-linked introgressions that were viable and fertile as  
21 homozygotes/hemizygotes in *C. nigoni* were unable to rescue the hybrid F1(b, n) male sterility,

1 whereas those that produced hybrid male sterility as hemizygotes in a wild-type *C. nigoni*  
2 background were able to rescue the male sterility (Fig. 2A), which is consistent with the notion  
3 that multiple independent X-autosome interactions that are involved in hybrid male sterility. It  
4 should be noted that our result did not preclude a possible role of a parental effect, or a much  
5 smaller size of the X Chromosome in *C. briggsae* than in *C. nigoni*, that is responsible for the  
6 hybrid male sterility. Indeed, the parental effect was also blamed for the observed hybrid  
7 inviability between *C. remanei* and *C. laten* [29].

8

### 9 **Rescued fertile F1(b, ir) male facilitates precise mapping of X-autosome interaction**

10 Precise isolation of the interacting genomic interval is challenging in the hybrid F1 animals due to  
11 the complication of the coexistence of both parental genomes. However, backcrossing of the  
12 rescued F1(b, n) males with *C. nigoni* permits isolation of the precise interacting loci responsible  
13 for hybrid male fertility in *C. nigoni* (Fig. 4A). We successfully isolated a *C. briggsae* interval of  
14 1.1 Mb in size on the Chromosome II that interacts with *zzyIR10330*, which is essential for hybrid  
15 male fertility in an otherwise *C. nigoni* background, indicating that a specific interaction between  
16 *zzyIR10330* and the *C. nigoni* genomic interval homologous to the mapped *C. briggsae* interval  
17 that is responsible for the *C. nigoni* male sterility (Fig. 6). However, it remains possible that there  
18 could be other autosomal loci that also interact with the introgression and rescue the male sterility,  
19 but are missed in our analysis. This possibility exists because we only randomly selected  
20 introgression-bearing males from each generation for backcrossing. Some other animals could

1 have carried different introgressions other than the one we isolated that could rescue the sterility,  
2 but they could have been missed during the backcrossing as used in this study. Given the relatively  
3 large size of the isolated genomic intervals involved in asymmetric hybrid male sterility, inviability  
4 or female inviability, it is possible that any single genomic interval may contain more than one  
5 genetic loci responsible of the observed rescue or killing. Fine mapping of these loci remains a  
6 significant challenge. Future studies should focus on the development of more reagents to allow  
7 systematic isolation of such interacting loci. One of the major limitations of our method of  
8 screening for the interacting loci is the lack of introgressions labelled with differential markers,  
9 such as GFP and red fluorescent protein (RFP). The RFP-labelled introgressions will allow direct  
10 testing of their interaction in *C. nigoni* by crossing the two *C. nigoni* strains that each carries an  
11 independent autosomal introgression labelled by RFP and *zzyIR10330*, for example, labeled by  
12 GFP. Rescue of the male sterility caused by *zzyIR10330* would be indicative of the two loci. It is  
13 worth noting that the genomic sequences between *C. briggsae* and *C. nigoni* diverge substantially  
14 from each other in both sequence identity and size [41,44], which significantly inhibits DNA  
15 recombination frequency. Selective loss of male-specific genes in hermaphroditic species and its  
16 subsequent reinforcement further complicates the precise mapping of HI loci using backcrossing.  
17 Therefore, development of overlapping introgressions in different colors provides an alternative  
18 to narrow the genomic interval for a given phenotype (Fig. 4A).

19

20 **Possible role of incompatibility between piRNA pathways in non-directional killing of hybrid**  
21 **F1 progeny**

1 Although Haldane's rule and Darwin's corollary to Haldane's rule are well supported in the  
2 hybrids between *C. briggsae* and *C. nigoni*, the hybrid females are fertile regardless of the crossing  
3 direction (Fig. 1). We were surprised to find that in the hybrid F1 progeny that is homozygous for  
4 the *zzyIR10018* region, both male and female progeny are inviable regardless of the parent of origin  
5 (Fig. 5A). Notably, the introgression spans the entire region of the second piRNA cluster on the *C.*  
6 *briggsae* Chromosome IV [45,46], which raises the possibility that incompatibility of these  
7 piRNAs between *C. briggsae* and *C. nigoni* that is responsible for the hybrid F1 inviability caused  
8 by crossing in both directions. Consistent with this notion is another piRNA cluster unique to *C.*  
9 *briggsae* on the Chromosome I [46]. The homozygosity of the region covering this cluster led to  
10 inviability in the hybrid F1 male and female progeny regardless of the parent of origin (Fig. 5A).  
11 The exact mechanism of directional killing remains to be determined.

12

## 13 **Materials and Methods**

14 ***Nematode strains and maintenance*** The following strains were used in the study: *C. briggsae*  
15 (AF16), *C. nigoni* (JU1421), *C. nigoni* cytoplasm-replaced hybrids (ZZY10357) and 29 *C. nigoni*  
16 strains carrying a GFP-flagged *C. briggsae* introgression (Table S1). ZZY10357 carrying a  
17 complete set of *C. nigoni* chromosomes and *C. briggsae* cytoplasm were generated by  
18 backcrossing *C. briggsae* hermaphrodites with *C. nigoni* male worms for 20 generations. Therefore,  
19 only mitochondria from *C. briggsae* but not from *C. nigoni* are present in *C. nigoni* background as  
20 judged by genotyping with *C. briggsae*-specific PCR primers. All strains were maintained at a

1 constant temperature of 25°C on 1.5% agar NGM (Nematode Growth Medium) plates seeded with  
2 the *E. coli* strain OP50.

3 ***Crossing setup and nomenclature of hybrid*** The paternal and maternal strains were named as  
4 described previously [8]. Specifically, the genotype of the hybrid F1 progeny was indicated by  
5 their parent of origin in the parenthesis after “F1”, which were separated by a comma. The letter  
6 “b” and “n” were used to denote *C. briggsae* and *C. nigoni*, respectively. The word “ir” was short  
7 for introgression and a 5-digit number derived from its corresponding strain name was used to  
8 denote a specific strain. For, example, F1(b, n) represented F1 hybrids from crossing between *C.*  
9 *briggsae* male and *C. nigoni* female animals, while F1(n, b) represented F1 hybrids from the  
10 opposite cross direction. When introgression-bearing *C. nigoni* male/female animals were crossed  
11 with *C. briggsae* hermaphrodite/male animals, their hybrids were referred to as F1(ir, b) and F1(b,  
12 ir), respectively with “ir” denoting “introgression”. For a specific introgression, a unique number  
13 derived from its name (Table S1) was used to replace “ir”. For example, F1(b, 10330) denoted  
14 hybrid F1 progeny derived from the cross between *C. briggsae* male and *C. nigoni* female carrying  
15 an introgression *zzyIR10330*.

16 ***Viability*** Hybrid viability was measured as the number of hybrids could that survive to adulthood.  
17 Specifically, F1(b, ir) or F1(ir, b) hybrid viability was measured by scoring the number of GFP-  
18 expressing and non-GFP-expressing male and female adults, which was used to evaluate the effect  
19 of an introgression on the hybrid viability relative to that of hybrid F1(b, n) or F1(n, b). Note that  
20 hybrid inviability was exclusively found in F1(n, b) male hybrids but not in F1(b, n) male or female  
21 hybrids from both cross directions.

1 **Male ratio** Given there was some intraspecific variations between male ratio scored using different  
2 strains [9], male ratio was scored in the hybrids derived from cross between wild isolates of *C.*  
3 *briggsae* (AF16) and *C. nigoni* (JU1421) in both cross directions as the control. For an  
4 introgression of interest, the hybrid male ratio was scored as the proportion of hybrid male adult  
5 expressing GFP out of all GFP-expressing hybrid progeny. The final ratio was calculated from the  
6 average of at least 3 replicates, each being scored for at least 150 animals.

7 **Fertility** Hybrid fertility was defined as the ability to produce embryos after mating with the  
8 opposite sex from either *C. briggsae* or *C. nigoni*. Note that hybrid sterility was exclusively found  
9 in F1(b, n) male but not in F1(b, n) or F1(n, b) female (Fig. 1) [8]. F1(n, b) male was unsuitable  
10 for fertility test due to hybrid inviability except in the case of rescued inviability. Fertility of hybrid  
11 males bearing an introgression of interest was evaluated by mating GFP-expressing males with *C.*  
12 *nigoni* L4 females or *C. briggsae* sperm-depleted hermaphrodites for 24 hours. Fertility of hybrid  
13 females bearing an introgression of interest was identified by mating GFP-expressing L4 females  
14 with *C. briggsae* or *C. nigoni* males for 24 hours. Fertility was quantified as brood size, which as  
15 calculated from the average number of embryos produced by at least three individual worms in  
16 their whole lifespan.

17 **Screen for selfing ability** *C. nigoni* carrying an introgression (GFP-expressing) were mated with  
18 *C. briggsae* for 12 hours in both directions. Parents were killed. Laid eggs were allowed to L4  
19 stage followed by transferring individual females into separate plates. Number of embryos and  
20 grown animals were counted after 72 hours cultivation on NGM plate with food. The F2 animals  
21 were mated *C. briggsae* and *C. nigoni* for fertility.

1 **Survival rate of backcrossing F2** In cross between F1 female hybrids and *C. briggsae* males,  
2 hundreds of backcrossing F2 embryos were laid but less than 1% of them were able to develop to  
3 adulthood. The crossing was set up by mating GFP-expressing F1(b, ir) or F1(ir, b) L4 females  
4 with *C. briggsae* males for 24 hours, followed by transferring the F1 female hybrids every 12 hours  
5 till they stopped laying more egg. The number of embryos and survived adults was counted. The  
6 survival rate was calculated as average ratio of F2 adults out of the total F2 embryos in 3 replicates,  
7 with at least 150 embryos counted in each replicate.

8 **Microscopy** A Leica LSM 510 confocal laser microscope was used for taking all DIC micrographs.  
9 Worms were paralyzed in M9 buffer with 0.05M sodium azide. Spermatids from dissected worms  
10 were incubated in sperm medium (SM) containing 50 mM HEPES pH7.8, 50 mM NaCl, 25 mM  
11 KCl, 5mM CaCl<sub>2</sub>, 1 mM MgSO<sub>4</sub>, 1 mg/ml BSA) [47].

12 **Sperm size quantification** GFP-expressing well-fed male was picked under stereo microscope.  
13 Spermatids were obtained by dissecting male worms in SM followed by imaging with the Leica  
14 microscope. ImageJ [48] was used to automatically measure cross-sectional area of spermatids  
15 using the function “particle analysis”. For each experiment, sperm size was measured for 3 to 4  
16 males, each producing 85 to 648 spermatids.

17 **Sperm activation and its quantification** Sperms were activated in freshly made SM containing  
18 diluted pronase (Sigma-Aldrich) in a final concentration of 200 ng/μl. Micrographs were taken  
19 within 5-30 minutes after dissection. Activation rate of wild-type *C. briggsae* or *C. nigoni* male  
20 sperms was scored as control. Sperm activation rate was calculated as percentage of average



1 activation rate (number of activated spermatids divided by number of all sperms in a microscopic  
2 view) of 3 to 4 male adults.

### 3 *Nanopore sequencing for genotyping zzyIR10230 that rescued the male sterility of ZZY10330*

4 Fertile GFP-expressing F20 male hybrids were mated with L4 stage *C. nigoni* female worms in  
5 three batches. Genomic DNA was extracted from the females of 21<sup>st</sup> generation backcrossing  
6 progeny. A total of 371 F21 adult females were picked for DNA extraction and Nanopore pore  
7 sequencing as described [41]. GFP-expressing F20 male hybrids were genotyped with PCR to  
8 ensure the boundary of X-linked introgression was the same with *zzyIR10330*, which produced the  
9 male sterility in *C. nigoni* background. It was expected that 100% of the F21 female worms carried  
10 the GFP-flagged *zzyIR10330* as a result of sex-linked segregation of the introgression, and 50%  
11 carried the non-GFP-flagged *zzyIR10230* both as a heterozygote. The Nanopore sequencing data  
12 were submitted to NCBI under BioProject number of PRJNA507071.

13

### 14 **Acknowledgments**

15 We thank Chung Wai Shing and Cindy Tan for logistic support and members of Zhao's lab for  
16 helpful comments. Some strains were provided by the CGC, which is funded by NIH Office of  
17 Research Infrastructure Programs (P40 OD010440).

18

### 19 **References**

- 1 1. Maheshwari S, Barbash DA. The Genetics of Hybrid Incompatibilities. *Annu Rev Genet.*  
2 Department of Molecular Biology and Genetics, Cornell University, Ithaca, NY 14853.;  
3 2010; doi:10.1146/annurev-genet-110410-132514
- 4 2. Lewontin RC. Dobzhansky's genetics and the origin of species: is it still relevant?  
5 *Genetics.* Museum of Comparative Zoology, Harvard University, Cambridge,  
6 Massachusetts 02138, USA. dick@mcz.harvard.edu; 1997;147: 351–355. Available:  
7 [http://www.ncbi.nlm.nih.gov/entrez/query.fcgi?cmd=Retrieve&db=PubMed&dopt=Citati](http://www.ncbi.nlm.nih.gov/entrez/query.fcgi?cmd=Retrieve&db=PubMed&dopt=Citation&list_uids=9335577)  
8 [on&list\\_uids=9335577](http://www.ncbi.nlm.nih.gov/entrez/query.fcgi?cmd=Retrieve&db=PubMed&dopt=Citation&list_uids=9335577)
- 9 3. Muller HJ. Isolating mechanisms, evolution, and temperature. *Biol Symp.* Nature  
10 Publishing Group; 1942;6: 71–125.
- 11 4. Schilthuizen M, Giesbers MCWG, Beukeboom LW. Haldane's rule in the 21st century.  
12 *Heredity (Edinb).* 2011;107: 95–102. doi:10.1038/hdy.2010.170
- 13 5. Turelli M, Moyle LC. Asymmetric postmating isolation: Darwin's corollary to Haldane's  
14 rule. *Genetics.* 2007;176: 1059–88. doi:10.1534/genetics.106.065979
- 15 6. Bi Y, Ren X, Yan C, Shao J, Xie D, Zhao Z. A Genome-wide hybrid incompatibility  
16 landscape between *Caenorhabditis briggsae* and *C. nigoni*. *PLoS Genet.* Department of  
17 Biology, Hong Kong Baptist University, Hong Kong, China.; Department of Biology,  
18 Hong Kong Baptist University, Hong Kong, China.; Department of Biology, Hong Kong  
19 Baptist University, Hong Kong, China.; Department of Biology, Hong K(TRUNCATED);  
20 2015;11: e1004993. doi:10.1371/journal.pgen.1004993 [doi]

- 1 7. Masly JP, Presgraves DC. High-resolution genome-wide dissection of the two rules of  
2 speciation in *Drosophila*. PLoS Biol. Department of Biology, University of Rochester,  
3 Rochester, New York, United States of America. masly@usc.edu; 2007;5: e243. doi:07-  
4 PLBI-RA-0409 [pii] 10.1371/journal.pbio.0050243
- 5 8. Woodruff GC, Eke O, Baird SE, Felix MA, Haag ES. Insights into species divergence and  
6 the evolution of hermaphroditism from fertile interspecies hybrids of *Caenorhabditis*  
7 nematodes. Genetics. Department of Biology, University of Maryland, College Park,  
8 Maryland 20742, USA.; 2010;186: 997–1012. doi:10.1534/genetics.110.120550
- 9 9. Kozłowska JL, Ahmad AR, Jahesh E, Cutter AD. Genetic variation for postzygotic  
10 reproductive isolation between *Caenorhabditis briggsae* and *Caenorhabditis* sp. 9.  
11 Evolution. Department of Ecology & Evolutionary Biology, University of  
12 Toronto, Toronto, ON, Canada.: The Society for the Study of Evolution; 2012;66: 1180–  
13 1195. doi:10.1111/j.1558-5646.2011.01514.x; 10.1111/j.1558-5646.2011.01514.x
- 14 10. Coyne JA. Genetic studies of three sibling species of *Drosophila* with relationship to  
15 theories of speciation. Genet Res. 1985;46: 169–192. Available:  
16 [http://www.ncbi.nlm.nih.gov/entrez/query.fcgi?cmd=Retrieve&db=PubMed&dopt=Citati](http://www.ncbi.nlm.nih.gov/entrez/query.fcgi?cmd=Retrieve&db=PubMed&dopt=Citation&list_uids=3936752)  
17 [on&list\\_uids=3936752](http://www.ncbi.nlm.nih.gov/entrez/query.fcgi?cmd=Retrieve&db=PubMed&dopt=Citation&list_uids=3936752)
- 18 11. Presgraves DC. Sex chromosomes and speciation in *Drosophila*. Trends Genet.  
19 Department of Biology, University of Rochester, Rochester, NY 14627, USA.  
20 [dvnp@mail.rochester.edu](mailto:dvnp@mail.rochester.edu) <[dvnp@mail.rochester.edu](mailto:dvnp@mail.rochester.edu)>; 2008;24: 336–343. doi:S0168-

- 1           9525(08)00156-X [pii] 10.1016/j.tig.2008.04.007
- 2   12.   Moran PA, Ritchie MG, Bailey NW. A rare exception to Haldane's rule: Are X  
3       chromosomes key to hybrid incompatibilities? *Heredity (Edinb)*. 2017;118: 554–562.  
4       doi:10.1038/hdy.2016.127
- 5   13.   Coyne JA, Orr HA. *Speciation*. Sunderland (Massachusetts): Sinauer Associates.; 2004. p.  
6       545 p.
- 7   14.   Hisamoto N, Matsumoto K. Signal transduction cascades in axon regeneration: insights  
8       from *C. elegans*. *Curr Opin Genet Dev*. 2017;44: 54–60. doi:10.1016/j.gde.2017.01.010
- 9   15.   Gieseler K. Development, structure, and maintenance of *C. elegans* body wall muscle.  
10      WormBook. 2017; 1–59. doi:10.1895/wormbook.1.81.2
- 11  16.   Shao J, He K, Wang H, Ho WS, Ren X, An X, et al. Collaborative regulation of  
12      development but independent control of metabolism by two epidermis-specific  
13      transcription factors in *Caenorhabditis elegans*. *J Biol Chem*. 2013;288: 33411–26.  
14      doi:10.1074/jbc.M113.487975
- 15  17.   Mango SE. The Molecular Basis of Organ Formation: Insights From the *C. elegans*  
16      Foregut. *Annu Rev Cell Dev Biol*. 2009;25: 597–628.  
17      doi:10.1146/annurev.cellbio.24.110707.175411
- 18  18.   Dey A, Chan CKW, Thomas CG, Cutter AD. Molecular hyperdiversity defines  
19      populations of the nematode *Caenorhabditis brenneri*. *Proc Natl Acad Sci U S A*. National

- 1 Academy of Sciences; 2013;110: 11056–60. doi:10.1073/pnas.1303057110
- 2 19. Ghosh R, Andersen EC, Shapiro JA, Gerke JP, Kruglyak L. Natural variation in a chloride  
3 channel subunit confers avermectin resistance in *C. elegans*. *Science*. Lewis-Sigler  
4 Institute for Integrative Genomics, Department of Ecology and Evolutionary Biology, and  
5 Howard Hughes Medical Institute, Princeton University, Princeton, NJ 08544, USA.;  
6 2012;335: 574–578. doi:10.1126/science.1214318; 10.1126/science.1214318
- 7 20. Zamanian M, Cook DE, Zdraljevic S, Brady SC, Lee D, Lee J, et al. Discovery of  
8 genomic intervals that underlie nematode responses to benzimidazoles. Mitreva M, editor.  
9 *PLoS Negl Trop Dis*. 2018;12: e0006368. doi:10.1371/journal.pntd.0006368
- 10 21. Ben-David E, Burga A, Kruglyak L. A maternal-effect selfish genetic element in  
11 *Caenorhabditis elegans*. *Science*. American Association for the Advancement of Science;  
12 2017;356: 1051–1055. doi:10.1126/science.aan0621
- 13 22. Seidel HS, Rockman M V, Kruglyak L. Widespread genetic incompatibility in *C. elegans*  
14 maintained by balancing selection. *Science* (80- ). Lewis-Sigler Institute for Integrative  
15 Genomics and Department of Ecology and Evolutionary Biology, Princeton University,  
16 Princeton, NJ 08544, USA. hseidel@princeton.edu; 2008;319: 589–594. doi:1151107 [pii]  
17 10.1126/science.1151107
- 18 23. Baird SE, Sutherlin ME, Emmons SW. REPRODUCTIVE ISOLATION IN  
19 RHABDITIDAE (NEMATODA: SECERNENTEA); MECHANISMS THAT ISOLATE  
20 SIX SPECIES OF THREE GENERA. *Evolution*. 1992;46: 585–594. doi:10.1111/j.1558-

- 1           5646.1992.tb02067.x
- 2   24.   Kiontke KC, Felix MA, Ailion M, Rockman M V, Braendle C, Penigault JB, et al. A  
3           phylogeny and molecular barcodes for *Caenorhabditis*, with numerous new species from  
4           rotting fruits. *BMC Evol Biol*. Department of Biology, New York University, 100  
5           Washington Square East New York, New York 10003, USA. [kk52@nyu.edu](mailto:kk52@nyu.edu); 2011;11:  
6           339. doi:10.1186/1471-2148-11-339
- 7   25.   Felix MA, Braendle C, Cutter AD. A streamlined system for species diagnosis in  
8           *Caenorhabditis* (Nematoda: Rhabditidae) with name designations for 15 distinct biological  
9           species. *PLoS One*. Ecole Normale Superieure, Institut de Biologie de l'ENS (IBENS),  
10          Paris, France; CNRS UMR 8197, Paris, France; Inserm U1024, Paris, France.; Institut de  
11          Biologie Valrose, CNRS UMR7277, Parc Valrose, Nice, France; INSERM U1091, Nice,  
12          France; Unive(TRUNCATED); 2014;9: e94723. doi:10.1371/journal.pone.0094723 [doi]
- 13   26.   Huang R-E, Ren X, Qiu Y, Zhao Z. Description of *Caenorhabditis sinica* sp. n.  
14          (Nematoda: Rhabditidae), a nematode species used in comparative biology for *C. elegans*.  
15          *PLoS One*. 2014;9: e110957. doi:10.1371/journal.pone.0110957
- 16   27.   Bundus JD, Wang D, Cutter AD. Genetic basis to hybrid inviability is more complex than  
17          hybrid male sterility in *Caenorhabditis* nematodes. *Heredity (Edinb)*. Nature Publishing  
18          Group; 2018;121: 169–182. doi:10.1038/s41437-018-0069-y
- 19   28.   Dey A, Jin Q, Chen Y-C, Cutter AD. Gonad morphogenesis defects drive hybrid male  
20          sterility in asymmetric hybrid breakdown of *Caenorhabditis* nematodes. *Evol Dev*.

- 1           2014;16: 362–372. doi:10.1111/ede.12097
- 2   29.   Bundus JD. Genetic basis to hybrid inviability is more complex than hybrid male sterility  
3           in *Caenorhabditis* nematodes. *Heredity* (Edinb). 2018; doi:10.1038/s41437-018-0069-y
- 4   30.   Zhao Z, Boyle TJ, Bao Z, Murray JI, Mericle B, Waterston RH. Comparative analysis of  
5           embryonic cell lineage between *Caenorhabditis briggsae* and *Caenorhabditis elegans*. *Dev*  
6           *Biol.* 2008;314: 93–9. doi:10.1016/j.ydbio.2007.11.015
- 7   31.   Bi Y, Ren X, Yan C, Shao J, Xie D, Zhao Z. A Genome-wide hybrid incompatibility  
8           landscape between *Caenorhabditis briggsae* and *C. nigoni*. *PLoS Genet.* 2015;11:  
9           e1004993. doi:10.1371/journal.pgen.1004993
- 10 32.   Yan C, Bi Y, Yin D, Zhao Z. A method for rapid and simultaneous mapping of genetic  
11           loci and introgression sizes in nematode species. *PLoS One.* 2012;7: e43770.  
12           doi:10.1371/journal.pone.0043770
- 13 33.   Bundus JD, Alaei R, Cutter AD. Gametic selection, developmental trajectories, and  
14           extrinsic heterogeneity in Haldane’s rule. *Evolution.* 2015;69: 2005–17.  
15           doi:10.1111/evo.12708
- 16 34.   Ragavapuram V, Hill EE, Baird SE. Suppression of F1 Male-Specific Lethality in  
17           *Caenorhabditis* Hybrids by *cbr-him-8*. *G3&#58; Genes|Genomes|Genetics.* 2016;6:  
18           623–629. doi:10.1534/g3.115.025320
- 19 35.   Ryan LE, Haag ES. Revisiting Suppression of Interspecies Hybrid Male Lethality in

- 1        *Caenorhabditis* Nematodes. *G3*; Genes|Genomes|Genetics. 2017;7: 1211–1214.  
2        doi:10.1534/g3.117.039479
- 3    36.    Vielle A, Callemeyn-Torre N, Gimond C, Pouillet N, Gray JC, Cutter AD, et al.  
4        Convergent evolution of sperm gigantism and the developmental origins of sperm size  
5        variability in *Caenorhabditis* nematodes. doi:10.1101/050252
- 6    37.    Ting JJ, Woodruff GC, Leung G, Shin NR, Cutter AD, Haag ES. Intense sperm-mediated  
7        sexual conflict promotes reproductive isolation in *caenorhabditis* nematodes. *PLoS Biol.*  
8        Department of Ecology and Evolutionary Biology, University of Toronto, Toronto,  
9        Ontario, Canada.; Department of Biology, University of Maryland, College Park,  
10        Maryland, United States of America.; Department of Ecology and Evolutionary Biology,  
11        U(UNIVERSITY OF TORONTO); 2014;12: e1001915. doi:10.1371/journal.pbio.1001915 [doi]
- 12    38.    Sturgill D, Zhang Y, Parisi M, Oliver B. Demasculinization of X chromosomes in the  
13        *Drosophila* genus. *Nature*. 2007;450: 238–241. doi:10.1038/nature06330
- 14    39.    Long M, Vibranovski MD, Zhang YE. Evolutionary interactions between sex  
15        chromosomes and autosomes. *Rapidly Evolving Genes and Genetic Systems*. Oxford  
16        University Press; 2012. pp. 101–114. doi:10.1093/acprof:oso/9780199642274.003.0011
- 17    40.    Bai Y, Casola C, Feschotte C, Betrán E. Comparative genomics reveals a constant rate of  
18        origination and convergent acquisition of functional retrogenes in *Drosophila*. *Genome*  
19        *Biol.* 2007;8: R11. doi:10.1186/gb-2007-8-1-r11
- 20    41.    Ren X, Li R, Wei X, Bi Y, Ho VWS, Ding Q, et al. Genomic basis of recombination



- 1 suppression in the hybrid between *Caenorhabditis briggsae* and *C. nigoni*. *Nucleic Acids*  
2 *Res.* 2018; doi:10.1093/nar/gkx1277
- 3 42. Yin D, Schwarz EM, Thomas CG, Felde RL, Korf IF, Cutter AD, et al. Rapid genome  
4 shrinkage in a self-fertile nematode reveals sperm competition proteins. *Science* (80- ).  
5 2018;359: 55–61. doi:10.1126/science.aao0827
- 6 43. Fierst JL, Willis JH, Thomas CG, Wang W, Reynolds RM, Ahearne TE, et al.  
7 Reproductive Mode and the Evolution of Genome Size and Structure in *Caenorhabditis*  
8 *Nematodes*. Blaxter M, editor. *PLOS Genet.* 2015;11: e1005323.  
9 doi:10.1371/journal.pgen.1005323
- 10 44. Yin D, Schwarz EM, Thomas CG, Felde RL, Korf IF, Cutter AD, et al. Rapid genome  
11 shrinkage in a self-fertile nematode reveals sperm competition proteins. *Science* (80- ).  
12 American Association for the Advancement of Science; 2018;359: 55–61.  
13 doi:10.1126/SCIENCE.AAO0827
- 14 45. Shi Z, Montgomery TA, Qi Y, Ruvkun G. High-throughput sequencing reveals  
15 extraordinary fluidity of miRNA, piRNA, and siRNA pathways in nematodes. *Genome*  
16 *Res.* 2013;23: 497–508. doi:10.1101/gr.149112.112
- 17 46. Li R, Ren X, Bi Y, Ho VWS, Hsieh C, Young A, et al. Specific downregulation of  
18 spermatogenesis genes targeted by 22G RNAs in hybrid sterile males associated with an  
19 X-Chromosome introgression. *Genome Res.* 2016; gr.204479.116.  
20 doi:10.1101/gr.204479.116

- 1 47. Nelson GA, Ward S. Vesicle fusion, pseudopod extension and amoeboid motility are  
2 induced in nematode spermatids by the ionophore monensin. *Cell*. 1980;19: 457–64.  
3 Available: <http://www.ncbi.nlm.nih.gov/pubmed/7357613>
- 4 48. Rueden CT, Schindelin J, Hiner MC, DeZonia BE, Walter AE, Arena ET, et al. ImageJ2:  
5 ImageJ for the next generation of scientific image data. *BMC Bioinformatics*. 2017;18:  
6 529. doi:10.1186/s12859-017-1934-z

## 7 8 **Figure legends**

9 **Fig. 1 Strategy of screening for changes in hybrid incompatible (HI) phenotypes in the F1**  
10 **progeny from crossing between wild-type *C. briggsae* and *C. nigoni* introgression lines as**  
11 **opposed to the F1 progeny from crossing between wild isolates of two parental species.** Shown  
12 are schematics of crossings with *C. briggsae* (b) wild isolate (n) as a father (A) or a mother (B).  
13 Crossings with *C. nigoni* wild isolate (n) or its introgression line (ir) are shown on the top and  
14 bottom, respectively. GFP-linked introgression on autosome or X chromosome are shown  
15 separately. HI phenotypes were scored for the F1 GFP-expressing (introgression-bearing) progeny  
16 as indicated. Survival of F2 progeny in the crossing between the hybrid F1 progeny and *C. briggsae*  
17 wild isolate was also counted. Crossing progeny was named as described previously [8]. Briefly,  
18 progeny are named after its genotype in parenthesis with paternal and maternal parents listed in  
19 the left and right, respectively.

1 **Fig. 2 Substitution of specific *C. nigoni* X fragments with its *C. briggsae* counterparts**  
2 **produces male sterility in *C. nigoni* but rescues male sterility in F1 (b, n) hybrid.**  
3 (A) Schematic representations of male fertility produced by *C. briggsae* introgressions in *C. nigoni*  
4 or by hybrid F1(b, ir). *C. briggsae* X chromosome (Cbr-X) is shown in scale as a black line.  
5 Positions for PCR primers used for genotyping are indicated as vertical line (Table S2). Blue thick  
6 bars above the X chromosome indicate previously mapped *C. briggsae* chromosome intervals  
7 responsible for the male sterility as an introgression in *C. nigoni* background. Thin bars underneath  
8 the X chromosome show the *C. briggsae* introgressions that produce hybrid F1(b, ir) fertile or  
9 sterile males, which are differentially color-coded in grey and green, respectively. For simplicity,  
10 the introgression name is shown as the 5-digits on the left without prefix “*zzyIR*”. Deduced  
11 intervals responsible for rescuing of hybrid F1 male sterility is highlighted in black boxes. (B)  
12 Quantification of hybrid F1(b, ir) male ratio in all GFP-expressing F1 progeny shown in 2A.  
13 Hybrid male fertility is color-coded as in 2A. Note that all the X-linked introgressions do not lead  
14 to a significant decrease in male ratio as opposed to the control except *zzyIR10307*, which produces  
15 a significant increase (student’s *t* test,  $p < 0.05$ ). Number of scored animals are indicated in  
16 parenthesis. Control: male ratio in wild-type F1(b, n) hybrids. (see also Fig. S5, where all  
17 autosome-linked introgressions produce a significant decrease in male ratio). (C) Quantification  
18 of sperm size. Shown are violin plots of sperm sizes from the parental (*C. nigoni* and *C. briggsae*)  
19 males, their hybrid F1(b, n) male, the introgression-bearing F1 hybrid male between wild type *C.*  
20 *briggsae* father and *C. nigoni* mother carrying either of the two introgressions, i.e., *zzyIR10330*  
21 and *zzyIR10307* with fertility color-coded in dark blue (sterile) or green (fertile). Number of sperms

1 scored are indicated. Note the size differences between wild type *C. briggsae* and *C. nigoni* males  
2 ( $p < 2.2e-16$ ), and between the sterile and fertile hybrid males ( $p < 2.2e-16$ ) (Wilcoxon signed-  
3 rank test).

4 D. Quantification of sperm activation rate. Shown are bar plots of activation rate from the males  
5 in 2C. Rescued fertile hybrid males carrying an introgression demonstrate an activation rate  
6 comparable to their parental species, which is significantly higher than those of the hybrid sterile  
7 F1(b, n) males ( $p < 0.01$ , Two-sample student's *t* test, unpaired).

8 E-N. Sperm morphology and activation in parental or hybrid males. Shown are the sperms before  
9 (E - I) and after activation (J - N). From left to right: parental (*Cni* and *Cbr*) males, their hybrid  
10 F1(b, n) male, the introgression-bearing hybrid F1 male between *C. briggsae* father and *C. nigoni*  
11 mother carrying either of the two introgressions, i.e., *zzyIR10330* and *zzyIR10307*. Sperms after  
12 activation by pronase treatment are shown at the bottom. Magnified views are shown in inset. The  
13 morphology of activation (pseudopod) seems abnormal in the sterile F1 hybrid.

14

15 **Fig. 3 Quantification of fertility rescue in hybrid F1 male.** Shown are bar plots of brood size  
16 (A), survival rate (B) and male ratio (C) of hybrid F2 progeny between the rescued F1 fertile males  
17 (F1 (b, 10330) and F1 (b, 10307)) and *C. briggsae* hermaphrodite or *C. nigoni* female, respectively.  
18 Number of the scored F1 males, F2 embryos and adults is indicated underneath each plot in (A),  
19 (B) and (C), respectively. Significant deviations from control is indicated with two stars ( $p < 0.01$ ,  
20 Student's *t* test). #: Brood size from crossing between F1(b, n) male and *C. nigoni* female (white

1 box)/*C. briggsae* hermaphrodite (black box). ##: Survival rate and male ratio of F1(b, n)(white  
2 box) and F1(n, b)(grey box) progeny.

3

4 **Fig. 4 Identification of *C. briggsae* autosomal loci that interact with introgression *zzyIR10330***  
5 **for rescuing the sterility of introgression-bearing *C. nigoni* male.** (A) Backcrossing strategy.  
6 Hybrid fertile F1 (b, 10330) male was backcrossed with wild-type *C. nigoni* for at least 20  
7 generations. In addition to the male fertility check, introgression bearing males were genotyped  
8 every 3-4 generations by PCR to ensure the absence of size change of the introgression,  
9 *zzyIR10330*, which could lead to the rescue of male sterility. (B) Mapping of autosomal loci co-  
10 segregating with *zzyIR10330*. Shown on the top is the genotyping results using NGS (see also Fig,  
11 Sxx), showing that the right arm of chromosome II is co-segregating with *zzyIR10330*, which is  
12 required for male fertility. Shown on the bottom is the fine mapping of interacting loci on  
13 chromosome II using existing introgressions on the chromosome II as indicated. Deduced smallest  
14 interval that rescues male sterility is highlighted in rectangle box.

15 **Fig. 5 Deviated hybrid F1 phenotypes from those of crossing progeny between parental**  
16 **species in the presence of autosomal introgression.** (A) List of deviated phenotypes in the hybrid  
17 F1 progeny. Chromosome, introgression and its name are indicated as in Fig. 2A. Introgressions  
18 with directional and unidirectional killing of hybrid F1 progeny (both male and female) are colored  
19 in orange and red, respectively. Introgression that rescues hybrid male inviability in F1 (n, b) is  
20 colored in blue. Deduced smallest interval responsible for a given phenotype is highlighted with

1 rectangle box. (B) Quantification of male ratio in introgression-bearing F1(ir, b) progeny with  
2 rescued male inviability (blue). Number of scored animals is indicated. Only introgressions on  
3 chromosome II and IV are found to be able to rescue the male inviability in F1 (n, b). Control:  
4 Male ratio in wild-type F1(n, b) was scored as the control group. (C) Statistics of sperm sizes in  
5 parental or hybrid males. Shown are violin plots of sperm size of wild-type males of *C. nigoni*  
6 (Cni) or *C. briggsae* (Cbr), sterile F1 hybrid (b, n) and F1(10353, b) males with the number of  
7 scored sperm indicated below. Note that the sperm size of the rescued sterile males is comparable  
8 to that of *C. briggsae* but are significantly smaller than those of *C. nigoni* male (Wilcoxon test,  $p$   
9  $< 2.2e-16$ ) (Fig. 2C).

10

11 **Fig. 6 Summary of interactions between X and autosome in determining male fertility and**  
12 **viability.** Shown are interactions using an X-linked introgression (*zzyIR10330*) and Chr-II-linked  
13 introgression (*zzyIR10353*) as an example. The two introgressions are indicated as a GFP and RFP-  
14 linked introgression, respectively. Hybrid phenotypes are indicated. Compatible and incompatible  
15 interactions are indicated with a black and red arrow. For simplicity, only chromosome II is  
16 indicated and introgression name is only denoted by its unique identifier within its name. Note that  
17 only a single interaction is indicated, but it is possible that there are more interactions between  
18 other part of the autosome and the X-linked fragment. A. Hybrid F1(b, n) male sterility produced  
19 by an interaction between *C. nigoni* homozygous regions of *zzyIR10330* and autosome. B. Hybrid  
20 male sterility of *C. nigoni* produced by an interaction between a small interval on the *C. nigoni*  
21 chromosome II and *zzyIR10330*. C. Hybrid F1 male inviability produced by an interaction between

1 *C. nigoni* homozygous regions of *zzyIR10353* and *C. briggsae* X. D. Hybrid F1(b, n) male  
2 inviability produced by an interaction between *zzyIR10353* and *C. nigoni* X.

3

#### 4 **Supporting information captions**

5 Fig S1. Morphology of males with various genetic background.

6

7 Fig S2. Morphology of hybrid F2 progeny derived from crossing between the rescued hybrid F1  
8 fertile male with *C. nigoni* female or *C. briggsae* hermaphrodite.

9

10 Fig S3. Quantification of survival rate of crossing F2 progeny between the *C. briggsae* male and  
11 the female of F1 (b, ir) or F1 (ir, b).

12

13 Fig S4. Determining the boundaries of co-segregating fragment that rescues the male sterility  
14 produced by *zzyIR10330* in *C. nigoni* using NGS.

15

16 Fig S5. Morphology of hybrid F1 sterile males from crossing between introgression-bearing *C.*  
17 *nigoni* male and *C. briggsae* hermaphrodite. Note that F1 (n, b) males are inviable.

18 Fig S6. Male ratio in introgression-bearing F1(b, ir) hybrids.

- 1 Table S1. Details of the introgression strains used in hybrid F1 phenotypic screening.
- 2 Table S2. List of the newly designed genotyping primers based on *C. briggsae* genome assembly
- 3 (cb4) in addition to those listed previously (Bi, et al., 2015, PLoS Genetics)
- 4 Table S3. Statistics of hybrid progeny resulting from crossings that produced complete inviability.
- 5



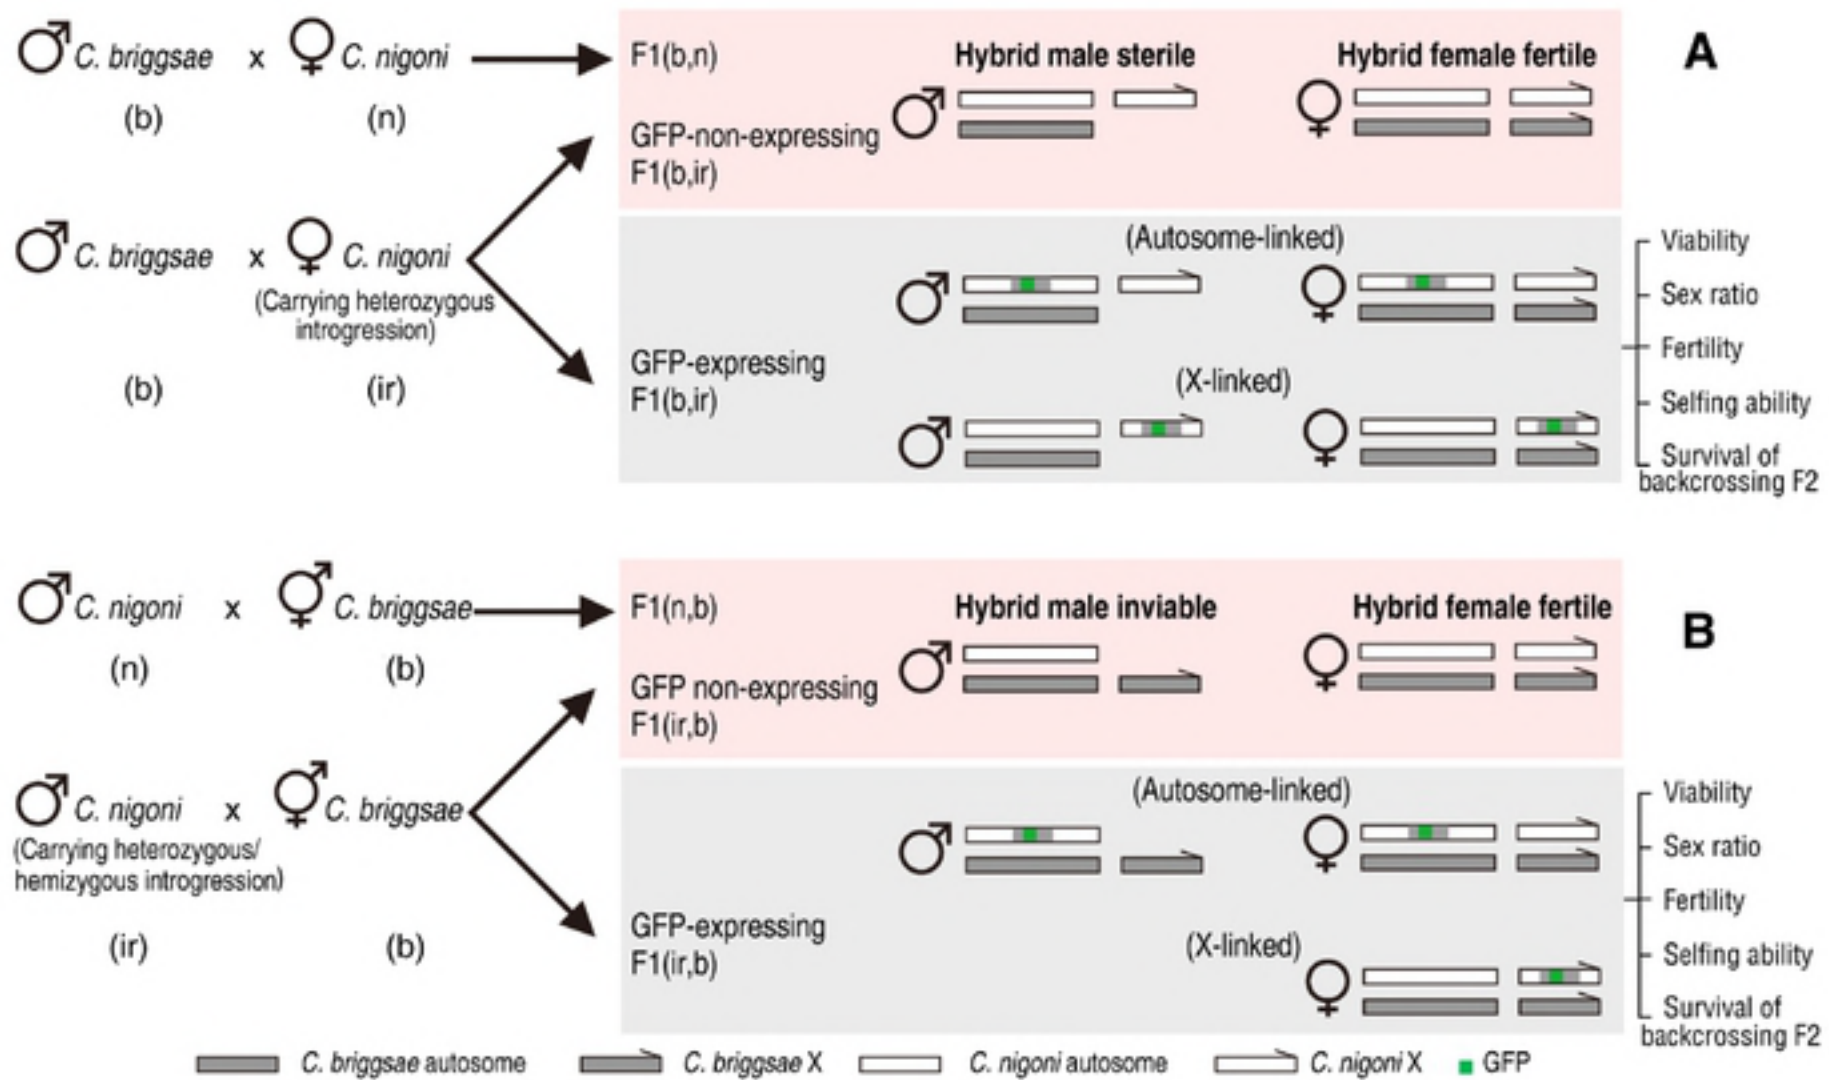

**Fig. 1**
